# Supplementary material
Source: ML conference proceedings conference paper supplement (https://openreview.net/forum?id=PwoplYNsBI)
Supplement: supplementary_material [file attachment]

# DEMYSTIFYING THE MYTHS AND LEGENDS OF NON-CONVEX CONVERGENCE OF SGD

**Anonymous authors**

Paper under double-blind review

## ABSTRACT

Stochastic gradient descent (SGD) and its variants are the main workhorses for solving large-scale optimization problems with nonconvex objective functions. Although the convergence of SGDs in the (strongly) convex case is well-understood, their convergence for nonconvex functions stands on weak mathematical foundations. Most existing studies on the nonconvex convergence of SGD show the complexity results based on either the minimum of the expected gradient norm or the functional sub-optimality gap (for functions with extra structural property) by searching the entire range of iterates. Hence the last iterations of SGDs do not necessarily maintain the same complexity guarantee. This paper shows that *an  $\epsilon$ -stationary point exists in the final iterates of SGDs*, given a large enough total iteration budget,  $T$ , not just anywhere in the entire range of iterates — a much stronger result than the existing one. Additionally, our analyses allow us to measure the *density of the  $\epsilon$ -stationary points* in the final iterates of SGD, and we recover the classical  $O(\frac{1}{\sqrt{T}})$  asymptotic rate under various existing assumptions on the objective function and the bounds on the stochastic gradient. As a result of our analyses, we addressed certain myths and legends related to the nonconvex convergence of SGD and posed some thought-provoking questions that could set new directions for research.

## 1 INTRODUCTION

We consider the *empirical risk minimization* (ERM) problem:

$$\min_{x \in \mathbb{R}^d} \left[ F(x) := \frac{1}{n} \sum_{i=1}^n f_i(x) \right], \quad (1)$$

where  $f_i(x) := \mathbb{E}_{z_i \sim \mathcal{D}_i} l(x; z_i)$  denotes the loss function evaluated on input,  $z_i$ , sampled from its distribution,  $\mathcal{D}_i$ . Additionally, let  $F$  be nonconvex, lower bounded, with Lipschitz continuous gradient; see §3. ERM problems appear frequently in statistical estimation and machine learning, where the parameter,  $x$ , is estimated by the SGD updates (Bottou et al., 2018; Xu et al., 2021). For a sequence of iterates,  $\{x_t\}_{t \geq 0}$  and a stepsize parameter,  $\gamma_t > 0$ , SGD updates are of the form:

$$x_{t+1} = x_t - \gamma_t g_t, \quad (2)$$

where  $g_t$  is an unbiased estimator of  $\nabla F(x_t)$ , the gradient of  $F$  at  $x_t$ ; that is,  $\mathbb{E}(g_t | x_t) = \nabla F(x_t)$ . This approach, as given in (2), can be implemented by selecting an index  $i(t)$  independently and uniformly from the set  $[n]$ , and processes  $g_t = \nabla f_{i(t)}(x_t)$ ; the same index can be selected again.

The convergence of SGD for the strongly convex functions is well understood (Shalev-Shwartz et al., 2009; Gower et al., 2019; Shamir & Zhang, 2013), but its convergence of the *last* iterates for nonconvex functions remains an open problem. For a nonconvex function,  $F$ , the existing convergence analyses of SGD show, as  $T \rightarrow \infty$ , either (i) the minimum of the norm of the gradient function,  $\min_{t \in [T]} \mathbb{E} \|\nabla F(x_t)\| \rightarrow 0$  (Ghadimi & Lan, 2013; Khaled & Richtárik, 2022; Stich & Karimireddy, 2020)<sup>1</sup> or (ii) the minimum sub-optimality gap,  $\min_{t \in [T]} (\mathbb{E}(F(x_t)) - F_*) \rightarrow 0$  (Gower et al., 2021;

<sup>1</sup>Some works show, as  $T \rightarrow \infty$ , the average of the expected gradient norm,  $\frac{1}{T} \sum_t \mathbb{E} \|\nabla F(x_t)\| \rightarrow 0$  for fixed stepsize, or the weighted average of the expected gradient norm,  $\frac{1}{\sum_t \gamma_t} \sum_t \gamma_t \mathbb{E} \|\nabla F(x_t)\| \rightarrow 0$  for variable stepsize (Bottou et al., 2018).

Lei et al., 2020). Notably, the first class uses the classical  $L$ -smoothness, and the size of the gradient function,  $\mathbb{E}\|\nabla F(x_t)\|$  to measure the convergence. Whereas the second class considers  $F$  to have extra structural property, such as Polyak-Łojasiewicz (PL) condition (Gower et al., 2021; Lei et al., 2020) and the minimum sub-optimality gap is the measure of convergence. Nevertheless, in both cases the notion of  $\epsilon$ -stationary points<sup>2</sup> is weak as they only consider the minimum of the quantity  $\mathbb{E}\|\nabla F(x_t)\|$  or  $(\mathbb{E}(F(x_t)) - F_*)$  approaching to 0 (as  $T \rightarrow \infty$ ) by searching over the entire range of iterates,  $[T]$ . Alongside, by adding one more random sampling step at the end,  $x_\tau \sim \{x_t\}_{t \in [T]}$ , some works show  $\mathbb{E}\|\nabla F_\tau(x_\tau)\| \rightarrow 0$  instead (Ghadimi & Lan, 2013; Stich & Karimireddy, 2020; Wang & Srebro, 2019).

In practice, we run SGD for  $T$  iterations (in the order of millions for DNN training) and return the last iterate (Shalev-Shwartz et al., 2011). Therefore, we may ask: *How practical is the notion of an  $\epsilon$ -stationary point?* E.g., training ResNet-50 (He et al., 2016) on ImageNet dataset (Deng et al., 2009) requires roughly 600,000 iterations. The present nonconvex convergence analysis of SGD tells only us that at one of those 600,000 iterations,  $\mathbb{E}\|\nabla F(x_t)\| \approx 0$ . Indeed, this is not a sufficiently informative outcome. That is, the existing results treat all the iterations equally, do not motivate why we need to keep producing more iterations, but only reveal that as long we are generating more iterations, one of them will be  $\epsilon$ -stationary point. However, numerical experiments suggest that running SGD for more iterations will produce  $\epsilon$ -stationary points progressively more frequently, and the final iterates of SGD will surely contain more  $\epsilon$ -stationary points. Motivated by the remarkable fact that *the research community chooses high iteration counts to ensure convergence*, we investigate the theoretical foundations that justify the success of this common practice by asking the following questions: *Can we guarantee the existence of  $\epsilon$ -stationary point for SGD for the nonconvex case in the tail of the iterates, given a large enough iteration budget,  $T$ ?* But guaranteeing the final iterates of SGD contain one of the  $\epsilon$ -stationary points alone does not conclude the task: we also would like to quantify the denseness of these  $\epsilon$ -stationary points among the last iterates. In all cases, in  $T$  iterations, SGD achieves an optimal  $O(\frac{1}{\sqrt{T}})$  asymptotic convergence rate for nonconvex,  $L$ -smooth functions (Carmon et al., 2020). A more refined analysis is required to capture this asymptotic rate.

We answer these questions and make the following contributions:

- For any stepsize (constant or decreasing), we show the existence of  $\epsilon$ -stationary points in the final iterates of SGD for nonconvex functions; see Theorem 2 in §4. We show that for every fixed  $\eta \in (0, 1]$ , there exists a  $T$ , large enough, such that there exists  $\epsilon$ -stationary point in the final  $\eta T$  iterations. We can recover the classic  $O(\frac{1}{\sqrt{T}})$  convergence rate of nonconvex SGD under no additional assumptions.
- An interesting consequence of our analyses is that we can measure the *concentration of the  $\epsilon$ -stationary points* in the final iterates of SGD—A first standalone result; see §4, Theorem 5 and 6. That is, we show that the concentration of the  $\epsilon$ -stationary points over the tail portion for the SGD iterates,  $x_t$  is almost 1 for large  $T$ , where  $t \in [(1 - \eta)T, T]$  and  $\eta \in (0, 1]$ . In optimization research community it is commonly agreed that without abundantly modifying the SGD algorithm, it is impossible to guarantee the convergence of the *last iterate* of SGD for nonconvex functions with the classic asymptotic rate (Dieuleveut et al., 2023, p.17). Therefore, on a higher level, our result clarifies common intuitions in the community: (i) why we need to keep on producing more iterations while running SGD; and (ii) why the practitioners usually pick the *last iterate of SGD* instead of randomly picking *one of the many iterates* as suggested by the present nonconvex theory. We acknowledge that these points are intuitive but taken for granted in the optimization research community without a theory. Additionally, we can extend our techniques to the convergence of random-reshuffling SGD (RR-SGD) and SGD for nonconvex and nonsmooth objectives; see §B.3 and §B.4.
- We informally addressed certain myths and legends that shape the practical success of SGD in the nonconvex world. We provide simple and interpretable reasons why some of these directions do not contribute to the success and posed some thought-provoking questions which could set new directions for research. We also support our theoretical results by performing numerical experiments on nonconvex functions, both smooth (logistic regres-

<sup>2</sup>A stationary point is either a local minimum, a local maximum, or a saddle point. In nonconvex convergence of SGD,  $x$  is an  $\epsilon$ -stationary point if  $\mathbb{E}\|\nabla F(x)\| \leq \epsilon$  or  $(\mathbb{E}(F(x)) - F_*) \leq \epsilon$ .

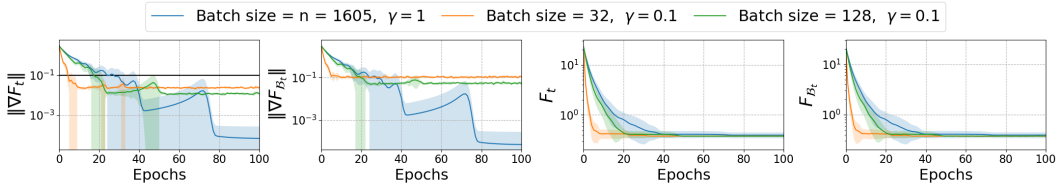

Figure 1: Average of 10 runs of SGD on logistic regression with nonconvex regularization. Batch size,  $n = 1, 605$ , represents full batch. In the first column, the horizontal lines correspond to the precision,  $\epsilon = 10^{-1}$ , and conform to our theoretical result in Theorem 3—If the total number of iterations is large enough then almost all the iterates in the tail are  $\epsilon$ -stationary points.

sion with nonconvex penalty) and nonsmooth (feed-forward neural network with ReLU activation); see §5. For publicly available code see §C.

## 2 BRIEF LITERATURE REVIEW

The convergence of SGD for convex and strongly convex functions is well understood; see §A for a few related work. We start with nonconvex convergence of SGD.

**Nonconvex convergence of SGD** was first proposed by Ghadimi & Lan (2013) for nonlinear, nonconvex stochastic programming. Inspired by Nesterov (2003); Gratton et al. (2008), Ghadimi & Lan (2013) showed that SGD achieves  $\min_{t \in [T]} \mathbb{E} \|\nabla F(x_t)\|^2 \leq \epsilon$  after running for at most  $O(\epsilon^{-2})$  steps—same complexity as the gradient descent for solving equation 1. Ghadimi et al. (2016) extended their results to a class of constrained stochastic composite optimization problems with loss function as the sum of a differentiable (possibly nonconvex) function and a non-differentiable, convex function. Recently, Vaswani et al. (2019) proposed a *strong growth condition* of the stochastic gradient, and showed that under SGC with a constant  $\rho$ , SGD with a constant step-size can attain the optimal rate,  $O(\epsilon^{-1})$  for nonconvex functions; see Theorem 3 which is an improvement over Ghadimi & Lan (2013). Stich & Karimireddy (2020) proposed the  $(M, \sigma^2)$  noise bound for stochastic gradients and proposed a convergence analysis for (compressed and/or) error-compensated SGD; see (Stich et al., 2018; Sahu et al., 2021). For nonconvex functions, Stich & Karimireddy (2020) showed  $\mathbb{E} \|\nabla F(x_\tau)\| \rightarrow 0$ , where  $x_\tau \sim \{x_t\}_{t \in [T]}$ . At about the same time, Khaled & Richtárik (2022) proposed a new assumption, *expected smoothness*, see Assumption 3, for modelling the second moment of the stochastic gradient and achieved the optimal  $O(\epsilon^{-2})$  rate for SGD in finding stationary points for nonconvex,  $L$ -smooth functions. Among others, Lei et al. (2020) used Holder’s continuity on gradients and showed the nonconvex convergence of SGD. Additionally, they showed the loss,  $F$  converges to an *almost surely bounded random variable*. By using mini-batches to control the loss of iterates to non-attracted regions, Fehrman et al. (2020) proved the convergence of SGD to a minimum for *not necessarily* locally convex nor contracting objective functions. Additionally, for convergence of proximal stochastic gradient algorithms (with or without variance reduction) for nonconvex, nonsmooth finite-sum problems, see Reddi et al. (2016); Li & Li (2018); for non-convex problems with a non-smooth, non-convex regularizer, see Xu et al. (2019).

**Adaptive gradient methods** such as ADAM (Kingma & Ba, 2015), AMSGrad (Reddi et al., 2018), AdaGrad (Duchi et al., 2011) are extensively used for DNN training. Although the nonconvex convergence of these algorithms are more involved than SGD, they focus on the same quantities as SGD to show convergence. See nonconvex convergence of ADAM and AdaGrad by Défossez et al. (2020), nonconvex convergence for AdaGrad by Ward et al. (2019), Theorem 2.1; also, see Theorem 3 in (Zhou et al., 2020), and Theorem 2 in (Yang et al., 2016) for a unified analysis of stochastic momentum methods for nonconvex functions. Recently, Jin et al. (2022) proved almost sure asymptotic convergence of momentum SGD and AdaGrad.

**Compressed and distributed SGD** is widely studied to remedy the network bottleneck in bandwidth limited training of large DNN models, such as federated learning (Konečný et al., 2016; Kairouz et al., 2021). The convergence analyses of compressed and distributed SGD for nonconvex loss (Dutta et al., 2020; Xu et al., 2021; Alistarh et al., 2017; Sahu et al., 2021; Stich & Karimireddy, 2020) follow the same structure of the existing nonconvex convergence of SGD.

**Structured nonconvex convergence analysis of SGD and similar methods.** Gower et al. (2021) used extra structural assumptions on the nonconvex functions and showed SGD converges to a global

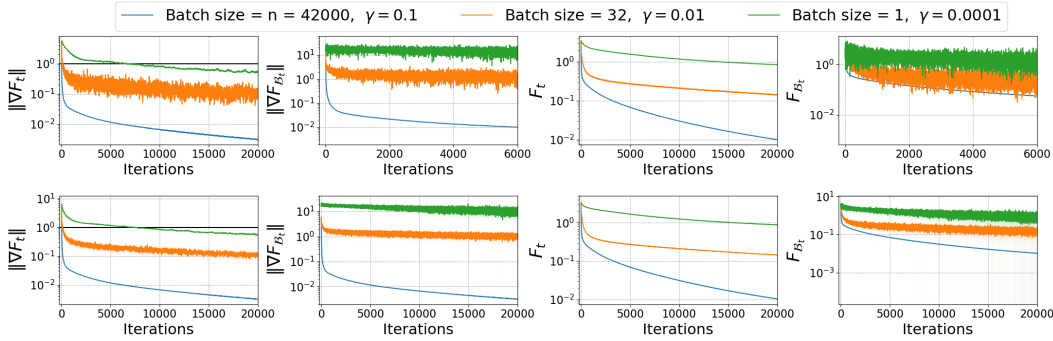

Figure 2: Performance of SGD on MNIST digit classification. The top row shows the result of 1 single run of SGD while the bottom row shows the result of the average of 10 runs. For the plots in the first column, the horizontal lines correspond to the precision,  $\epsilon = 1$ —For SGD, if the total number of iterations is large enough then the entire tail comprises of the  $\epsilon$ -stationary points. These plots confirm our observation in Figure 1 but for more complicated models.

minimum. Gorbunov et al. (2021) showed when  $F$  is cocoercive (monotonic and  $L$ -Lipschitz gradient), the last-iterate for extra gradient (Korpelevich, 1976) and optimistic gradient method (Popov, 1980) converge at  $O(\frac{1}{T})$  rate.

### 3 ASSUMPTIONS

**Assumption 1. (Global minimum)** There exists  $x_*$  such that  $F_* := F(x_*) \leq F(x)$  for all  $x \in \mathbb{R}^d$ .

**Assumption 2. (Smoothness)** For every  $i \in [n]$ , the function  $f_i : \mathbb{R}^d \rightarrow \mathbb{R}$  is  $L$ -smooth, i.e.  $f_i(y) \leq f_i(x) + \langle \nabla f_i(x), y - x \rangle + \frac{L}{2} \|y - x\|^2$  for all  $x, y \in \mathbb{R}^d$ .

*Remark 1.* The above implies that  $F$  is  $L$ -smooth.

**Bound on stochastic gradient.** There are different assumptions to bound the stochastic gradient. One may follow the model of Stich & Karimireddy (2020): Let the stochastic gradient in (2),  $g_t$ , at iteration  $t$  be of the form,  $g_t = \nabla F_t + \xi_t$ , with  $\mathbb{E}[\xi_t | x_t] = 0$ . This leads to the  $(M, \sigma^2)$ -bounded noise assumption on the stochastic gradient (Stich & Karimireddy, 2020). Among different assumptions on bounding the stochastic gradient (Bottou et al., 2018; Ghadimi & Lan, 2013; Stich & Karimireddy, 2020; Lei et al., 2020; Gower et al., 2021; Vaswani et al., 2019; Dutta et al., 2020), recently, Khaled & Richtárik (2022) noted that the expected smoothness is the weakest among them and is as follows:

**Assumption 3. (Expected smoothness)** There exist constants  $A, B, C \geq 0$  such that for all  $x_t \in \mathbb{R}^d$ , we have  $\mathbb{E}[\|g_t\|^2 | x_t] \leq 2A(F_t - F_*) + B\|\nabla F(x_t)\|^2 + C$ .

Our analyses is based on Assumption 3 which contains other assumptions as special cases.

### 4 ANALYSIS

The standard analysis of nonconvex convergence of SGD use the minimum of the expected gradient norm,  $\min_{t \in [T]} \mathbb{E} \|\nabla F(x_t)\| \rightarrow 0$ , or the average of the expected gradient norm,  $\frac{1}{T} \sum_t \mathbb{E} \|\nabla F(x_t)\| \rightarrow 0$  as  $T \rightarrow \infty$ , by using different conditions on the second moment of the stochastic gradient. In this section, we first modify that result and show that the last iterations of SGD would maintain the same complexity guarantee under different stepsize choices but under the same set of assumptions. Finally, an interesting consequence of our convergence analyses is that they allow us to measure the *density of the  $\epsilon$ -stationary points* in the final iterates of SGD without any additional assumptions. Denote  $r_t = \mathbb{E} \|\nabla F(x_t)\|^2$ ,  $\delta_t = \mathbb{E}(F_t) - F_*$ , and  $D_T := \prod_{t=1}^T (1 + LA\gamma_t^2)$ . Further denote the set of indices of  $\epsilon$ -stationary points,  $S_\epsilon := \{t : r_t \leq \epsilon\}$ . For  $\eta \in (0, 1]$ , let  $S_{\epsilon, \eta} = S_\epsilon \cap [(1 - \eta)T, T]$ . We start by quoting the general result for nonconvex convergence of SGD which is contained in the derivation of many known results in the literature.

**Theorem 1.** Suppose Assumptions 1, 2, and 3 hold. With the notations above, we have for any learning rate  $(\gamma_t)$  satisfying  $\gamma_t \leq 1/LB$  that  $\sum_{t=1}^T \gamma_t r_{t-1} \leq (2\delta_0 + \frac{C}{A}) D_T$ .

From Theorem 1, we obtain the classic nonconvex convergence of SGD with a constant learning rate. For decreasing learning rate of Theorem 1, see Corollary 2.

**Corollary 1** (Constant learning rate). (*Khaled & Richtárik, 2022*) For constant stepsize  $\gamma_t = \gamma$  in Theorem 1, we have  $\min_{1 \leq t \leq T} r_t \leq \frac{D_T}{\gamma T} (2\delta_0 + \frac{C}{A}) \leq \frac{3\sqrt{LA}}{\ln(3)\sqrt{\gamma T}} (2\delta_0 + \frac{C}{A})$ .

Corollary 1 shows that in the entire range of iterates,  $[T]$ , there is one  $r_t$  that approaches to 0 with a rate  $O(\frac{1}{\sqrt{T}})$  as  $T \rightarrow \infty$ . But as we mentioned, this information is imprecise.

We now outline the proof of Theorem 1. Note that the key step using the  $L$ -smoothness of  $F$  and *expected smoothness* of the stochastic gradients is the following inequality (*Khaled & Richtárik, 2022, Lemma 2*):

$$\gamma_t \left(1 - \frac{LB\gamma_t}{2}\right) r_t \leq (1 + LA\gamma_t^2) \delta_t - \delta_{t+1} + \frac{LC\gamma_t^2}{2}. \quad (3)$$

Next, for any learning rate  $(\gamma_t)$  chosen such that  $\sum_{t=1}^{\infty} \gamma_t^2 < \infty$ , we have  $D_{\infty} \leq \exp(LA \sum_{t=1}^{\infty} \gamma_t^2) < \infty$ . Unrolling the recurrence relation in (3) reduces the LHS to  $\sum_{t=1}^T \prod_{i=t+1}^T (1 + LA\gamma_i^2) (\gamma_t - LB\gamma_t^2/2) r_{t-1}$ . If we assume  $\gamma_t \leq 1/LB$ , then  $\gamma_t - LB\gamma_t^2/2 \geq \gamma_t - \gamma_t/2 = \gamma_t/2$ , and the lower bound of the LHS of the inequality (3) becomes  $\frac{1}{2} \sum_{t=1}^T \gamma_t r_{t-1}$ , as  $\prod_{i=1}^T (1 + LA\gamma_i^2) \geq 1$ . Hence, the proof of Theorem 1; see more detailed proof in §B.1.

Can we do any better? The answer to this question demystifies the first myth of the nonconvex convergence of SGD.

**Myth I: The nonconvex convergence of SGD is given by the minimum of the norm of the gradient function,  $r_t$ , over the range of entire iterates  $[T]$ .** For any  $k \in [T]$ , we can split the LHS  $\frac{1}{2} \sum_{t=1}^T \prod_{i=t+1}^T (1 + LA\gamma_i^2) \gamma_t r_{t-1}$  of Theorem 1 into two sums as:  $\frac{1}{2} \sum_{t=1}^{k-1} \prod_{i=t+1}^T (1 + LA\gamma_i^2) \gamma_t r_{t-1} + \frac{1}{2} \sum_{t=k}^T \prod_{i=t+1}^T (1 + LA\gamma_i^2) \gamma_t r_{t-1}$ . Manipulating these quantities, we can obtain more precise information on the convergence of the  $r_t$  in the tail portion of the iterates of SGD for nonconvex functions, which is given by  $\min_{k \leq t \leq T} r_t$ . To the best of our knowledge, this marks an improvement over the existing classical convergence results in Ghadimi & Lan (2013); Khaled & Richtárik (2022); Stich & Karimireddy (2020). We formally quote this in the following theorem; see proof in Appendix §B.

**Theorem 2.** Suppose Assumptions 1, 2, and 3 hold. For any learning rate  $(\gamma_t)$  satisfying  $\gamma_t \leq 1/LB$ , we have for any  $k \in [T]$ ,  $\min_{k \leq t \leq T} r_t \leq \left(2\delta_0 + \frac{C}{A} - \frac{2\delta_T}{D_T} - \frac{1}{LA\gamma_1} \min_{1 \leq t \leq k-1} r_t\right) LA\gamma_k D_k \leq \left(2\delta_0 + \frac{C}{A}\right) LA\gamma_k D_k$ .

In the subsequent analyses, we shed more light on the above result by considering different stepsizes.

**Constant step-size**  $\gamma_t = \gamma$ . Denote  $D := (1 + L\gamma^2 A)$ ,  $E := \gamma(1 - LB\gamma/2)$ ,  $F := \frac{L\gamma^2 C}{2}$ , and  $W = \sum_{t=0}^T D^t$ . By using (3), the existing results show,  $\min_{t \in [T]} r_t \rightarrow 0$ . First, we will improve this result.

Unrolling the recurrence in (3), and using the above mentioned notations, we have:

$$\sum_{t=0}^T (1 + L\gamma^2 A)^{T-t} r_t + \frac{2\delta_{T+1}}{\gamma(2 - L\gamma B)} \leq \frac{2\delta_0(1 + L\gamma^2 A)^{T+1}}{\gamma(2 - LB\gamma)} + \frac{C[(1 + L\gamma^2 A)^{T+1} - 1]}{\gamma A(2 - LB\gamma)}. \quad (4)$$

Let  $\eta \in (0, 1]$ . The LHS in the inequality (4) is bounded from below by

$$\min_{(1-\eta)^T \leq t \leq T} r_t \sum_{(1-\eta)^T \leq t \leq T} (1 + L\gamma^2 A)^{T-t} \geq (\eta T - 1) \min_{(1-\eta)^T \leq t \leq T} r_t;$$

if  $LB\gamma \leq 1$  and  $(1 + L\gamma^2 A)^{T+1} \leq 3$  then the RHS of (4) could be bounded from above by

$$\frac{6\delta_0}{\gamma} + \frac{2C}{\gamma A}. \quad (5)$$

Hence, we obtain

$$\min_{(1-\eta)^T \leq t \leq T} r_t \leq 2 \left(3\delta_0 + \frac{C}{A}\right) \frac{1}{(\eta T - 1)\gamma}. \quad (6)$$

Now, letting  $\gamma := \sqrt{\frac{\ln 3}{(T+1)LA}}$ , we can show the following result; see Appendix §B.2 for the proof.

**Theorem 3.** *Suppose Assumptions 1, 2, and 3 hold. Let  $\epsilon > 0$  and  $\eta \in (0, 1]$ . If the number of iterations  $T \geq 1$  satisfies  $T \geq \max \left\{ \left( \frac{4\sqrt{2}LA(3\delta_0 + C/A)}{\epsilon\eta\sqrt{\ln 3}} \right)^2, \frac{LB^2 \ln 3}{A} - 1, \frac{2}{\eta} \right\}$ , then, there exists an index  $t \geq (1 - \eta)T$  such that  $\mathbb{E}\|\nabla F(x_t)\|^2 \leq \epsilon$ .*

By controlling the stepsize parameter, Theorem 3 shows the  $\epsilon$ -stationary points exist in the final iterates of SGD for minimizing nonconvex functions.

*Remark 2.* Let  $\epsilon > 0$ . For choice of arbitrary  $\eta \in (0, 1)$ , and  $T = \Omega \left( \max \left\{ \frac{1}{\eta}, \frac{1}{\eta^2 \epsilon^2} \right\} \right)$ , there exists a  $t \in [(1 - \eta)T, T]$ , such that,  $\mathbb{E}\|\nabla F(x_t)\|^2 \leq \epsilon$ . E.g., take  $\eta = 0.05$  in the Theorem above. Then we know that the last 5% steps in the  $T$  iterations will produce at least one  $\epsilon$ -stationary point. For  $\eta = 1$  in Theorem 3, we recover the classical asymptotic convergence rate of SGD, that is,  $\min_{t \in [T]} \mathbb{E}\|\nabla F(x_t)\|^2 = O \left( \frac{1}{\sqrt{T}} \right)$ .

*Remark 3.* Our choice of  $\gamma$  makes the expression  $(1 + L\gamma^2 A)^{T+1}$  contained in  $[\sqrt{3}, 3]$  to the right of 1 on the real line. Any stepsize such that the expression is contained in an interval on the right of 1 will work, only with the difference in the constants in the estimations.

**Decreasing step-size.** We consider stepsize  $\gamma_t = \frac{\gamma_0}{\sqrt{t+1}}$  with  $\gamma_0 > 0$ , and adopt a slightly different technique. Inspired by Stich & Karimireddy (2020), we define a non-negative, decreasing weighting sequence,  $\{w_t\}_{t=0}^T$ , such that  $w_{-1} = 1$  and  $w_t := \frac{w_{t-1}}{(1 + L\gamma_t^2 A)}$ . Note that, the weights do not appear in the convergence result. With these weights, and by using the notations before, we can rewrite (3) as:

$$w_t \gamma_t \left(1 - \frac{LB\gamma_t}{2}\right) r_t \leq w_t (1 + L\gamma_t^2 A) \delta_t - w_t \delta_{t+1} + \frac{w_t L\gamma_t^2 C}{2}.$$

Taking summation on above from  $t = 0$  to  $t = T$ , we have

$$\sum_{t=0}^T w_t \gamma_t \left(1 - \frac{LB\gamma_t}{2}\right) r_t \leq \delta_0 + \frac{LC}{2} \sum_{t=0}^T w_t \gamma_t^2. \quad (7)$$

The RHS of (7) is bounded above by

$$\delta_0 + \frac{LC}{2} \gamma_0^2 (\ln(T+1) + 1). \quad (8)$$

Following the same technique as in the constant stepsize case, the LHS of (7) is bounded from below by

$$\begin{aligned} & (1 - LA\gamma_0^2 \ln(T+1)) \min_{(1-\eta)T \leq t \leq T} r_t (\gamma_0 (1 - \sqrt{1-\eta}) \sqrt{T+1} - \frac{LB\gamma_0^2}{2} \ln(T+1) \\ & + \frac{LB\gamma_0^2}{2} \ln([(1-\eta)T] + 1)). \end{aligned} \quad (9)$$

Combining (8) and (9), we can state the following Theorem; see Appendix §B.2 for the proof.

**Theorem 4.** *Suppose Assumptions 1, 2, and 3 hold. Let  $\eta \in (0, 1]$ . By choosing the step-size  $\gamma_t = \frac{\gamma_0}{\sqrt{t+1}}$  with  $\gamma_0^2 < \frac{1}{LA \ln(T+1)}$ , there exists a step  $t \geq (1 - \eta)T$  such that  $\mathbb{E}\|\nabla F(x_t)\|^2 \leq \frac{F_0 - F_* + \frac{LC\gamma_0^2}{2} (\ln(T+1) + 1)}{(1 - LA\gamma_0^2 \ln(T+1)) \mathcal{C}(t)}$ , where  $\mathcal{C}(t) := (\gamma_0 \eta \sqrt{T+1} - \frac{LB\gamma_0^2}{2} \ln(T+1) + \frac{LB\gamma_0^2}{2} \ln([(1-\eta)T] + 1))$ .*

*Remark 4.* From the previous Theorem we have for all fixed  $\eta$  in  $(0, 1]$  there exists a  $t \in [(1 - \eta)T, T]$ , such that  $\mathbb{E}\|\nabla F(x_t)\|^2 = O \left( \frac{\ln(T+1)}{\sqrt{T+1}} \right)$ . For  $\eta = 1$ , we recover the classical asymptotic convergence rate of SGD.

This result is also an improvement over the existing nonconvex convergence results of SGD for decreasing stepsize (Khaled & Richtárik, 2022; Stich & Karimireddy, 2020). See Corollary 3 in §B for decreasing stepsize of the form  $\gamma_t = \gamma t^{-\alpha}$  with  $\alpha \in (1/2, 1)$ . One could think of other stepsizes in Theorem 2, e.g.,  $O(1/\sqrt{t})$ ,  $O(1/\ln(t)\sqrt{t})$ , and so on, and find the same guarantee.

## Open questions

(i) For SGD, without an iteration budget,  $T$ , are there practical ways to detect the first iterate,  $t$ , for which  $\mathbb{E}\|\nabla f(x_t)\|^2 \leq \epsilon$ ? (ii) How to terminate SGD other than the maximum number of iterations?

**Legend I: As long as (3) is used as a key descent inequality, there is no better convergence result.** Recall (3) is the key inequality to prove the convergence of SGD for nonconvex and  $L$ -smooth functions; see Theorem 1. We modified (3), and give the convergence of SGD in the tail for  $\eta T$  iterations with  $\eta \in (0, 1)$ . For  $\eta \in (0, 1)$ , one could think of taking  $k$  in specific form in Theorem 2, e.g.,  $k = (1 - \eta)T$ ,  $k = (1 - 1/\eta)T$ ,  $k = T - \eta \ln(T)$  or  $k = T - \ln(T)$ , and get a  $O(\frac{1}{\sqrt{T}})$  convergence rate for the tail. However, if  $k = T - \mathcal{C}$ , where  $\mathcal{C}$  is a constant, the rate disappears. Therefore, we must design a better descent inequality than (3).

**Myth II: Different stepsize choices result in novel convergence guarantees for SGD.** Several works propose a plethora of stepsize choices to boost the convergence of SGD (Gower et al., 2021; Loizou et al., 2021; Schaipp et al., 2023); (Wang et al., 2021) provide nonconvex convergence results for step decay. Since the quantity for convergence and the key descent step is problematic, different stepsize choices result only in incremental improvement other than a giant leap.

**Myth III: Better assumptions in upper bounding the stochastic gradients result in better convergence.** Recently, Allen-Zhu et al. (2019) showed why first-order methods such as SGD can find global minima on the training objective of multi-layer DNNs with ReLU activation and almost surely achieves close to zero training error in polynomial time. It was possible because the authors proved two instrumental properties of the loss,  $F$ : (i) gradient bounds for points that are sufficiently close to the random initialization, and (ii) semi-smoothness.

Assumptions on the bounds of the stochastic gradient are important, but this work does not judge which is better than the other as the literature has established potentially many interplays between them. Nevertheless, no significant improvements are possible following the present approach unless we propose completely new Assumptions, which should also be practical; but they are not easy to make. New assumptions on the upper bound of the stochastic gradients would only lead to minor improvements.

## Open questions

Yu et al. (2021) assume the dissipativity property of the loss function,  $F$  (less restrictive than convexity), and obtained guarantees on the last iterate of SGD. (i) What is the biggest class of nonconvex functions for which we can still have such guarantees? (ii) What are the minimal additional assumptions on  $F$  to ensure the convergence of the last iterate?

**Legend II: If SGD is run for many iterates, then the tail will almost surely produce  $\epsilon$ -stationary points.** It is almost impossible to prove the last iterate convergence of SGD for nonconvex functions (see discussion in Dieuleveut et al. (2023)), but empirical evidence tells that the stationary points are mostly concentrated at the tail (Shalev-Shwartz et al., 2011). Nevertheless, how can we formalize it? The central idea in Theorem 3 is to bound a weighted sum of the gradient norms over all iterations from below by a partial sum over the last  $\eta T$  iterations. Moreover, the result is not only mathematically stronger than the existing ones, but the simple trick of the partial sum over the last  $\eta T$  iterations leads us to another significant result.

We know  $S_{\epsilon, \eta} \neq \emptyset$  by Theorem 3. On one hand, we have

$$\begin{aligned} \sum_{t=(1-\eta)T}^T (1 + L\gamma^2 A)^{T-t} r_t &> \sum_{\substack{t \in S_{\epsilon}^c \\ t \geq (1-\eta)T}} (1 + L\gamma^2 A)^{T-t} r_t > \sum_{t=(1-\eta)T+|S_{\epsilon, \eta}|}^T (1 + L\gamma^2 A)^{T-t} \epsilon \\ &\geq \frac{(1 + L\gamma^2 A)^{\eta T - |S_{\epsilon, \eta}|} - 1}{L\gamma^2 A} \epsilon, \end{aligned} \quad (10)$$

where  $|S_{\epsilon, \eta}|$  denotes the cardinality of the set  $S_{\epsilon, \eta}$ . Note that,  $\sum_{\substack{t \in S_{\epsilon}^c \\ t \geq (1-\eta)T}} (1 + L\gamma^2 A)^{T-t} r_t$  has  $(\eta T - |S_{\epsilon, \eta}| + 1)$  terms; so, we lower bound them with the smallest of those many terms. On the

other hand, using (4) and (5) to bound the left hand side of (10), and rearranging the terms we obtain

$$(1 + L\gamma^2 A)^{\eta T - |S_{\epsilon, \eta}|} \leq \frac{6\delta_0 L\gamma A + 2CL\gamma}{\epsilon} + 1.$$

Taking logarithm to the previous inequality and rearranging the terms we get the following theorem:

**Theorem 5.** *Suppose Assumptions 1, 2, and 3 hold. Let  $\epsilon > 0$  and  $\eta \in (0, 1]$ . For constant stepsize  $\gamma_t = \gamma$ , we have  $\frac{|S_{\epsilon, \eta}|}{\eta T} \geq 1 - \frac{1}{T} \frac{\ln\left(\frac{6\delta_0 L\gamma A + 2CL\gamma}{\epsilon} + 1\right)}{\eta \ln(1 + L\gamma^2 A)}$ .*

From the previous Theorem, we see that the density of the  $\epsilon$ -stationary points in the top  $\eta$  portion of the tails approaches 1 as  $T$  increases, which roughly speaking, tells us that for  $T$  large enough almost all the iterations  $x_t$  for  $t \in [(1 - \eta)T, T]$  are  $\epsilon$ -stationary points.

Recall, from Theorem 3, if the total number of iterations,  $T$  is large enough then there will be iterate,  $t \in [(1 - \eta)T, T]$  to produce  $\mathbb{E}\|\nabla F_t\|^2 \leq \epsilon$ , where  $\eta \in (0, 1]$ . That is, Theorem 3 guarantees the existence of (at least one) stationary point(s) in the final iterates. However, one can argue that the effect of  $\eta$  in the complexity can make it worse when  $\eta$  is small, which requires the SGD to run for a sufficiently large number of iterations. Whereas the claim  $\frac{|S_{\epsilon, \eta}|}{\eta T} \rightarrow 1$  as  $T \rightarrow \infty$ , says that running SGD for a large number of iterations,  $T$  is not necessarily problematic, as almost surely the density of the stationary points in the tail portion will approach to 1, guaranteeing the entire tail comprising mostly of  $\epsilon$ -stationary points; see Figure 3.

Similarly, for the decreasing stepsize case, from Theorem 4, we have  $S_{\epsilon, \eta} \neq \emptyset$ . For  $T$  large enough, we can lower bound the left side of the inequality (7) as

$$\begin{aligned} \sum_{t=0}^T w_t \gamma_t \left(1 - \frac{LB\gamma_t}{2}\right) r_t &\geq \epsilon w_T \sum_{\substack{t \in S_{\epsilon, \eta}^c \\ t \geq (1-\eta)T}} \left(\gamma_t - \frac{LB\gamma_t^2}{2}\right) \geq \epsilon(1 + L\gamma_0^2 A(T + 1))(\gamma_0 \sqrt{T + 1} \\ &- \gamma_0 \sqrt{(1 - \eta)T + |S_{\epsilon, \eta}|} - \frac{LB\gamma_0^2}{2} \ln(T + 1)). \end{aligned}$$

The above, combined with the upper bound in (8) can be written as

$$\gamma_0(\sqrt{T + 1} - \sqrt{(1 - \eta)T + |S_{\epsilon, \eta}|}) \leq \underbrace{\frac{\delta_0 + \frac{LC}{2}\gamma_0^2(\ln(T + 1) + 1)}{(1 + L\gamma_0^2 A(T + 1))} + \frac{LB\gamma_0^2}{2} \ln(T + 1)}_{:=\mathcal{D}},$$

which can be further reduced to

$$\frac{|S_{\epsilon, \eta}|}{\eta T} \geq 1 - 2 \frac{\mathcal{D}}{\gamma_0 \eta \sqrt{T}} + \frac{\mathcal{D}^2}{\gamma_0^2 \eta T}. \quad (11)$$

Formally, we summarize it in the following theorem.

**Theorem 6.** *Suppose Assumptions 1, 2, and 3 hold. Let  $\epsilon > 0$  and  $\eta \in (0, 1]$ . For decreasing step size,  $\gamma_t = \frac{\gamma_0}{\sqrt{t+1}}$  with  $\gamma_0 > 0$ , we have  $\frac{|S_{\epsilon, \eta}|}{\eta T} \geq 1 - O\left(\frac{1}{\sqrt{T}}\right)$ .*

Similar to the argument for constant stepsize case, we conclude that the density of the  $\epsilon$ -stationary points in the top  $\eta$  portion of the tail approaches to 1 as  $T$  increases.

*Remark 5.* For stepsizes of the form  $\gamma_t = \gamma t^{-\alpha}$  with  $\alpha \in (1/2, 1)$ , and  $\gamma \in \mathbb{R}^+$ , or other stepsizes, e.g.,  $O(1/\sqrt{t})$ ,  $O(1/\ln(t)\sqrt{t})$ , and so on, we can find similar guarantee.

**Connection with the high probability bounds.** The *high probability* convergence results, first used by Kakade & Tewari (2008), and then in Harvey et al. (2019a;b), proved convergence bounds for different class of loss functions (e.g., Lipschitz and strongly convex, but not necessarily differentiable; Lipschitz and convex, but not necessarily strongly convex or differentiable) by using rate Martingale and generalized Freeman's inequality. For Lipschitz and strongly convex functions, but not necessarily differentiable, Harvey et al. (2019a) proved that after  $T$  steps of SGD, the error of the final iterate is  $O(\log(T)/T)$  with high probability; also, see De Sa et al. (2015) for global convergence of SGD for matrix completion and related problems. Cutkosky & Mehta (2021) provided high-probability



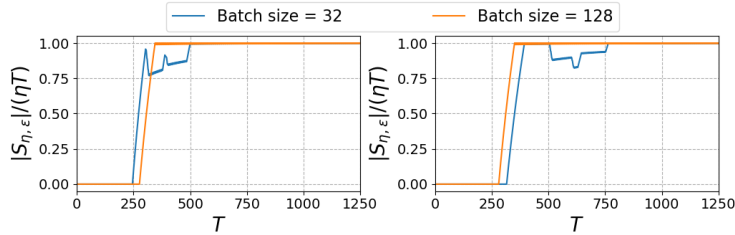

Figure 3: Concentration of the  $\epsilon$ -stationary points,  $|S_{\epsilon,\eta}|/\eta T$  vs. Iterations for nonconvex logistic regression problem running SGD (left) and *random reshuffling SGD* (RR-SGD) (right) for choice of  $\epsilon = 10^{-2}$  and  $\eta = 0.2$ . See theoretical convergence result of RR-SGD in Appendix B.3. As  $T$  increases,  $|S_{\epsilon,\eta}|/\eta T \rightarrow 1$  from below. The tail will *almost surely* produce  $\epsilon$ -stationary points and their density in the tail will approach to 1—It confirms our theoretical finding in Theorem 5.

bounds for nonconvex stochastic optimization with heavy tails. We refer to Arjevani et al. (2019) and references therein for the lower bound on the complexity of finding an  $\epsilon$ -stationary point using stochastic first-order methods. Harvey et al. (2019a) mentioned “high probability bounds are more difficult,” as it controls the total noise of the noisy (sub)-gradients at each iteration, and not obvious that the error of the final iterate is tightly concentrated. To our knowledge, there is no trivial analysis. In contrast, we show the concentration of  $\epsilon$ -stationary point,  $|S_{\epsilon,\eta}|/\eta T$  in the final iterates of nonconvex SGD as  $T$  increases, approaches to 1, using simple arguments. Similar to Harvey et al. (2019a), our result can be generalized for SGD with suffix averaging or weighted averaging.

## 5 NUMERICAL EVIDENCE

We conduct experiments on nonconvex functions with  $L$ -smooth and non-smooth (for DNNs) loss to substantiate our theoretical results that are based on stochastic gradient,  $g_t$ . In practice,  $g_t$  can be calculated by sampling and processing minibatches of data. Therefore, besides  $\|\nabla F(x_t)\|$  and  $F(x_t)$ , we also track, the norm of the minibatch stochastic gradient,  $\|\nabla F_{\mathcal{B}_t}\|$ , and minibatch stochastic loss,  $F_{\mathcal{B}_t}$ . Note that,  $\mathcal{B}_t$  is the selected minibatch of data at iteration  $t$  and  $F_{\mathcal{B}_t} := \frac{1}{|\mathcal{B}_t|} \sum_{i \in \mathcal{B}_t} f_i(x_t)$ . **Nonconvex and  $L$ -smooth loss.** We consider logistic regression with nonconvex regularization:

$$\min_{x \in \mathbb{R}^d} \left[ F(x) := \frac{1}{n} \sum_{i=1}^n \ln(1 + \exp(-a_i^\top x)) + \lambda \sum_{j=1}^d \frac{x_j^2}{1+x_j^2} \right],$$

where  $a_1, a_2, \dots, a_n \in \mathbb{R}^d$  are the given data, and  $\lambda > 0$  is the regularization parameter. We run the experiments on the `ala` dataset from LIBSVM (Chang & Lin, 2011), where  $n = 1605$ ,  $d = 123$ , and set  $\lambda = 0.5$ . Figures 1 (and Figure 4 in §B.3 for RR-SGD) shows the average of 10 runs of SGD with different minibatch sizes. The shaded area is given by  $\pm\sigma$  where  $\sigma$  is the standard deviation.

**Nonconvex and nonsmooth loss.** We use a feed forward neural network (FNN) for MNIST digit (LeCun et al., 1998) classification. The FNN has one hidden layer with 256 neurons activated by ReLU, and an 10 dimensional output layer activated by the softmax function. The loss function is the categorical cross entropy. We calculate the loss and the stochastic gradient during the training by using different minibatches. The entire loss and the full gradient are computed using all  $n = 42 \times 10^3$  samples. For the average of 10 runs, the shaded area is given by  $\pm\sigma$ , where  $\sigma \geq 0$  is the standard deviation, and  $\gamma$  is the learning rate. Figures 2 in the main paper (and Figure 5 in §B.3) show if the total number of iterations is large enough then the entire tail comprising of the  $\epsilon$ -stationary points.

**Concentration of  $\epsilon$ -stationary points.** For  $\epsilon = 10^{-2}$  and  $\eta = 0.2$ , in Figure 3, we plot the density of the  $\epsilon$ -stationary points,  $|S_{\epsilon,\eta}|/\eta T$  as a function of iteration,  $T$  for nonconvex logistic regression problems. As  $T$  increases,  $|S_{\epsilon,\eta}|/\eta T \rightarrow 1$  from below, and conform our result in §4.

## 6 CONCLUSION

To the best of our knowledge, this is the first work that proves the existence of an  $\epsilon$ -stationary point in the final iterates of SGD in optimizing nonconvex functions, given a large enough total iteration budget,  $T$ , and measures the concentration of such  $\epsilon$ -stationary points in the final iterates. Alongside, by using simple reasons, we informally addressed certain myths and legends that determine the practical success of SGD in the nonconvex world and posed some new research questions.

## REFERENCES

- Dan Alistarh, Demjan Grubic, Jerry Li, Ryota Tomioka, and Milan Vojnovic. QSGD: Communication-efficient SGD via gradient quantization and encoding. In *Advances in Neural Information Processing System*, pp. 1709–1720, 2017.
- Zeyuan Allen-Zhu, Yuanzhi Li, and Zhao Song. A convergence theory for deep learning via over-parameterization. In *International Conference on Machine Learning*, pp. 242–252, 2019.
- Yossi Arjevani, Yair Carmon, John Duchi, Dylan Foster, Nathan Srebro, and Blake Woodworth. Lower bounds for non-convex stochastic optimization. *CoRR*, abs/1912.02365, 2019. URL <http://arxiv.org/abs/1912.02365>.
- Yoshua Bengio. Practical recommendations for gradient-based training of deep architectures. In *Neural networks: Tricks of the trade*, pp. 437–478. Springer, 2012.
- Léon Bottou, Frank Curtis, and Jorge Nocedal. Optimization methods for large-scale machine learning. *SIAM Review*, 60(2):223–311, 2018.
- Olivier Bousquet and André Elisseeff. Stability and generalization. *The Journal of Machine Learning Research*, 2:499–526, 2002.
- Yair Carmon, John Duchi, Oliver Hinder, and Aaron Sidford. Lower bounds for finding stationary points i. *Mathematical Programming*, 184(1):71–120, 2020.
- Chih-Chung Chang and Chih-Jen Lin. Libsvm: a library for support vector machines. *ACM transactions on intelligent systems and technology*, 2(3):1–27, 2011.
- Ashok Cutkosky and Harsh Mehta. High-probability bounds for non-convex stochastic optimization with heavy tails. In *Advances in Neural Information Processing Systems*, volume 34, pp. 4883–4895, 2021.
- Christopher De Sa, Christopher Re, and Kunle Olukotun. Global convergence of stochastic gradient descent for some non-convex matrix problems. In *International Conference on Machine Learning*, pp. 2332–2341, 2015.
- Alexandre Défossez, Léon Bottou, Francis Bach, and Nicolas Usunier. A simple convergence proof of ADAM and AdaGrad. *arXiv preprint arXiv:2003.02395*, 2020.
- Jia Deng, Wei Dong, Richard Socher, Li-Jia Li, Kai Li, and Li Fei-Fei. Imagenet: A large-scale hierarchical image database. In *Proceedings of the IEEE Conference on Computer Vision and Pattern Recognition*, pp. 248–255, 2009.
- Aymeric Dieuleveut, Gersende Fort, Eric Moulines, and Hoi-To Wai. Stochastic approximation beyond gradient for signal processing and machine learning. *arXiv preprint arXiv:2302.11147*, 2023.
- John Duchi, Elad Hazan, and Yoram Singer. Adaptive subgradient methods for online learning and stochastic optimization. *Journal of machine learning research*, 12(7), 2011.
- Aritra Dutta, ElHoucine Bergou, Ahmed Abdelmoniem, Chen-Yu Ho, Atal Sahu, Marco Canini, and Panos Kalnis. On the Discrepancy between the Theoretical Analysis and Practical Implementations of Compressed Communication for Distributed Deep Learning. In *Proc. of AAAI*, volume 34, pp. 3817–3824, 2020.
- Benjamin Fehrman, Benjamin Gess, and Arnulf Jentzen. Convergence rates for the stochastic gradient descent method for non-convex objective functions. *Journal of Machine Learning Research*, 21:136, 2020.
- Vitaly Feldman and Jan Vondrak. Generalization bounds for uniformly stable algorithms. In *Advances in Neural Information Processing Systems*, volume 31, 2018.
- Saeed Ghadimi and Guanghui Lan. Stochastic first-and zeroth-order methods for nonconvex stochastic programming. *SIAM Journal on Optimization*, 23(4):2341–2368, 2013.

- Saeed Ghadimi, Guanghui Lan, and Hongchao Zhang. Mini-batch stochastic approximation methods for nonconvex stochastic composite optimization. *Mathematical Programming*, 155(1-2): 267–305, 2016.
- Eduard Gorbunov, Nicolas Loizou, and Gauthier Gidel. Extragradient method:  $o(1/k)$  last-iterate convergence for monotone variational inequalities and connections with cocoercivity. *International Conference on Artificial Intelligence and Statistics*, 151:366–402, 2021.
- Robert Gower, Nicolas Loizou, Xun Qian, Alibek Sailanbayev, Egor Shulgin, and Peter Richtárik. SGD: General analysis and improved rates. In *Proceedings of the 36th International Conference on Machine Learning*, volume 97, pp. 5200–5209, 2019.
- Robert Gower, Othmane Sebbouh, and Nicolas Loizou. SGD for Structured Nonconvex Functions: Learning Rates, Minibatching and Interpolation . In *International Conference on Artificial Intelligence and Statistics*, volume 130, pp. 1315–1323, 2021.
- Serge Gratton, Annick Sartenaer, and Philippe Toint. Recursive trust-region methods for multiscale nonlinear optimization. *SIAM Journal on Optimization*, 19(1):414–444, 2008.
- Mert Gürbüzbalaban, Asu Ozdaglar, and Pablo Parrilo. Why random reshuffling beats stochastic gradient descent. *Mathematical Programming*, 186(1):49–84, 2021.
- Moritz Hardt, Ben Recht, and Yoram Singer. Train faster, generalize better: Stability of stochastic gradient descent. In *International Conference on Machine Learning*, pp. 1225–1234. PMLR, 2016.
- Nicholas Harvey, Christopher Liaw, Yaniv Plan, and Sikander Randhawa. Tight analyses for non-smooth stochastic gradient descent. In *Conference on Learning Theory*, volume 99, pp. 1579–1613, 2019a.
- Nicholas Harvey, Christopher Liaw, and Sikander Randhawa. Simple and optimal high-probability bounds for strongly-convex stochastic gradient descent. *arXiv preprint arXiv:1909.00843*, 2019b.
- Kaiming He, Xiangyu Zhang, Shaoqing Ren, and Jian Sun. Deep residual learning for image recognition. In *Proceedings of the IEEE conference on computer vision and pattern recognition*, pp. 770–778, 2016.
- Prateek Jain, Dheeraj Nagaraj, and Praneeth Netrapalli. Making the last iterate of sgd information theoretically optimal. In *Conference on Learning Theory*, volume 99, pp. 1752–1755, 2019.
- Ruinan Jin, Yu Xing, and Xingkang He. On the convergence of msgd and adagrad for stochastic optimization. In *International Conference on Learning Representations*, 2022.
- Peter Kairouz, Brendan McMahan, Brendan Avent, Aurélien Bellet, Mehdi Bennis, Arjun Bhagoji, Kallista Bonawitz, Zachary Charles, Graham Cormode, Rachel Cummings, et al. Advances and open problems in federated learning. *Foundations and Trends® in Machine Learning*, 14(1–2): 1–210, 2021.
- Sham Kakade and Ambuj Tewari. On the generalization ability of online strongly convex programming algorithms. In *Advances in Neural Information Processing Systems*, volume 21, 2008.
- Ahmed Khaled and Peter Richtárik. Better theory for SGD in the nonconvex world. *Transactions on Machine Learning Research*, 2022.
- Diederik Kingma and Jimmy Ba. Adam: A method for stochastic optimization. In *International Conference on Learning Representations*, 2015.
- Jakub Konečný, Brendan McMahan, Felix Yu, Peter Richtarik, Ananda Suresh, and Dave Bacon. Federated learning: Strategies for improving communication efficiency. In *Proc. of NeurIPS Workshop on Private Multi-Party Machine Learning*, 2016.
- Galina Korpelevich. The extragradient method for finding saddle points and other problems. *Mathematics*, 12:747–756, 1976.

- Yann LeCun, Léon Bottou, Yoshua Bengio, and Patrick Haffner. Gradient-based learning applied to document recognition. *Proceedings of the IEEE*, 86(11):2278–2324, 1998.
- Yunwen Lei and Yiming Ying. Fine-grained analysis of stability and generalization for stochastic gradient descent. In *International Conference on Machine Learning*, pp. 5809–5819, 2020.
- Yunwen Lei, Ting Hu, Guiying Li, and Ke Tang. Stochastic gradient descent for nonconvex learning without bounded gradient assumptions. *IEEE Transactions on Neural Networks and Learning Systems*, 31(10):4394–4400, 2020.
- Zhize Li and Jian Li. A simple proximal stochastic gradient method for nonsmooth nonconvex optimization. *Advances in neural information processing systems*, 31, 2018.
- Nicolas Loizou, Sharan Vaswani, Issam Laradji, and Simon Lacoste-Julien. Stochastic polyak step-size for sgd: An adaptive learning rate for fast convergence. In *International Conference on Artificial Intelligence and Statistics*, pp. 1306–1314, 2021.
- Konstantin Mishchenko, Ahmed Khaled Ragab Bayoumi, and Peter Richtárik. Random reshuffling: Simple analysis with vast improvements. In *Advances in Neural Information Processing Systems*, volume 33, pp. 17309–17320, 2020.
- Deanna Needell, Rachel Ward, and Nati Srebro. Stochastic gradient descent, weighted sampling, and the randomized kaczmarz algorithm. In *Advances in neural information processing systems*, volume 27, 2014.
- Yurii Nesterov. *Introductory lectures on convex optimization: A basic course*, volume 87. Springer Science & Business Media, 2003.
- Lam Nguyen, Quoc Tran-Dinh, Dzung Phan, Phuong Nguyen, and Marten van Dijk. A unified convergence analysis for shuffling-type gradient methods. *Journal of Machine Learning Research*, 22(207):1–44, 2021.
- Leonid Popov. A modification of the arrow-hurwicz method for search of saddle points. *Mathematical notes of the Academy of Sciences of the USSR*, 28(5):845–848, 1980.
- Pytorch.org. PyTorch, 2019. URL <https://pytorch.org/>.
- Sashank Reddi, Suvrit Sra, Barnabas Poczos, and Alexander Smola. Proximal stochastic methods for nonsmooth nonconvex finite-sum optimization. In *Advances in Neural Information Processing Systems*, volume 29, 2016.
- Sashank Reddi, Satyen Kale, and Sanjiv Kumar. On the convergence of Adam and beyond. In *International Conference on Learning Representations*, 2018.
- William Rogers and Terry Wagner. A finite sample distribution-free performance bound for local discrimination rules. *The Annals of Statistics*, pp. 506–514, 1978.
- Atal Sahu, Aritra Dutta, Ahmed Abdelmoniem, Trambak Banerjee, Marco Canini, and Panos Kalnis. Rethinking gradient sparsification as total error minimization. In *Advances in Neural Information Processing Systems*, volume 34, pp. 8133–8146, 2021.
- Fabian Schaipp, Robert Gower, and Michael Ulbrich. A stochastic proximal polyak step size. *Transactions on Machine Learning Research*, 2023. ISSN 2835-8856.
- Shai Shalev-Shwartz, Ohad Shamir, Nathan Srebro, and Karthik Sridharan. Stochastic convex optimization. In *Conference on Learning Theory*, volume 2, pp. 5, 2009.
- Shai Shalev-Shwartz, Yoram Singer, Nathan Srebro, and Andrew Cotter. Pegasos: Primal estimated sub-gradient solver for svm. *Mathematical programming*, 127(1):3–30, 2011.
- Ohad Shamir and Tong Zhang. Stochastic gradient descent for non-smooth optimization: Convergence results and optimal averaging schemes. In *Proceedings of the 30th International Conference on Machine Learning*, volume 28, pp. 71–79, 2013.

- Sebastian Stich and Sai Karimireddy. The error-feedback framework: Better rates for sgd with delayed gradients and compressed updates. *Journal of Machine Learning Research*, 21:1–36, 2020.
- Sebastian Stich, Jean-Baptiste Cordonnier, and Martin Jaggi. Sparsified SGD with memory. In *Advances in Neural Information Processing Systems*, pp. 4447–4458, 2018.
- tensorflow.org. TensorFlow, 2015. URL <https://tensorflow.org/>.
- Sharan Vaswani, Francis Bach, and Mark Schmidt. Fast and faster convergence of sgd for over-parameterized models and an accelerated perceptron. In *International Conference on Artificial Intelligence and Statistics*, pp. 1195–1204, 2019.
- Weiran Wang and Nathan Srebro. Stochastic nonconvex optimization with large minibatches. In *Algorithmic Learning Theory*, pp. 857–882. PMLR, 2019.
- Xiaoyu Wang, Sindri Magnússon, and Mikael Johansson. On the convergence of step decay step-size for stochastic optimization. In *Advances in Neural Information Processing Systems*, volume 34, pp. 14226–14238, 2021.
- Rachel Ward, Xiaoxia Wu, and Leon Bottou. Adagrad stepsizes: Sharp convergence over nonconvex landscapes. In *International Conference on Machine Learning*, pp. 6677–6686, 2019.
- Hang Xu, Chen-Yu Ho, Ahmed Abdelmoniem, Aritra Dutta, ElHoucine Bergou, Konstantinos Karatsenidis, Marco Canini, and Panos Kalnis. Grace: A compressed communication framework for distributed machine learning. In *IEEE 41st international conference on distributed computing systems*, pp. 561–572, 2021.
- Yi Xu, Rong Jin, and Tianbao Yang. Non-asymptotic analysis of stochastic methods for non-smooth non-convex regularized problems. In *Advances in Neural Information Processing Systems*, volume 32, 2019.
- Tianbao Yang, Qihang Lin, and Zhe Li. Unified convergence analysis of stochastic momentum methods for convex and non-convex optimization. *arXiv preprint arXiv:1604.03257*, 2016.
- Lu Yu, Krishnakumar Balasubramanian, Stanislav Volgushev, and Murat Erdogdu. An analysis of constant step size sgd in the non-convex regime: Asymptotic normality and bias. In *Advances in Neural Information Processing Systems*, volume 34, pp. 4234–4248, 2021.
- Dongruo Zhou, Jinghui Chen, Yuan Cao, Yiqi Tang, Ziyang Yang, and Quanquan Gu. On the convergence of adaptive gradient methods for nonconvex optimization. *OPT2020: 12th Annual Workshop on Optimization for Machine Learning*, 2020.

## A BRIEF LITERATURE REVIEW—CONTINUED

**Convergence of structured convex and strongly convex functions.** Among the seminal works, Shamir & Zhang (2013) were the first to show that the final iterate has expected error  $O(\frac{\ln T}{\sqrt{T}})$  for Lipschitz continuous functions and  $O(\frac{\ln T}{T})$  for strongly convex functions. Jain et al. (2019) designed a new step size sequence for convex and strongly convex function to enjoy information theoretically optimal bounds on the suboptimality of last point of SGD as well as GD, with high probability. Harvey et al. (2019a;b) proved convergence bounds for non-smooth, strongly convex case by using Freeman’s inequality.

**Stability and generalization bound**, that is, estimating the generalization error of learning algorithms is a classic problem and well studied; see for example, Rogers & Wagner (1978); Bousquet & Elisseeff (2002); Feldman & Vondrak (2018); Hardt et al. (2016); Lei & Ying (2020), among many. But stability and generalization of SGD is orthogonal to this work.

## B PROOFS

### B.1 GENERAL CONVERGENCE ANALYSIS OF NONCONVEX SGD — CLASSICAL RESULT

The proofs provided in this section are the classic convergence analysis of nonconvex SGD, inspired and adapted from the existing literature; see Ghadimi & Lan (2013); Stich & Karimireddy (2020); Khaled & Richtárik (2022). We provide them for completeness.

*Proof of Theorem 1.* Recall the recursive relation (3) derived using the  $L$ -smoothness of  $F$  and expected smoothness of the stochastic gradients  $g_t$ , e.g. see Lemma 2 in Khaled & Richtárik (2022):

$$\gamma_t \left(1 - \frac{LB\gamma_t}{2}\right) r_t \leq (1 + LA\gamma_t^2) \delta_t - \delta_{t+1} + \frac{LC\gamma_t^2}{2},$$

where  $r_t := \mathbb{E}\|\nabla F_t\|^2$  and  $\delta_t := \mathbb{E}F_t - F_*$ . Iterating the inequality above yields

$$\begin{aligned} \sum_{t=1}^T \prod_{i=t+1}^T (1 + LA\gamma_i^2) \left(\gamma_t - \frac{LB\gamma_t^2}{2}\right) r_{t-1} &\leq \prod_{t=1}^T (1 + LA\gamma_t^2) \delta_0 - \delta_T \\ &\quad + \frac{LC}{2} \sum_{t=1}^T \prod_{i=t+1}^T (1 + LA\gamma_i^2) \gamma_t^2 \\ &= \left(\delta_0 + \frac{C}{2A}\right) \prod_{t=1}^T (1 + LA\gamma_t^2) - \delta_T \\ &= \left(\delta_0 + \frac{C}{2A}\right) D_T - \delta_T \leq \left(\delta_0 + \frac{C}{2A}\right) D_T, \end{aligned}$$

where  $D_T := \prod_{t=1}^T (1 + LA\gamma_t^2)$ . Note, for any learning rate  $(\gamma_t)$  chosen such that  $\sum_{t=1}^{\infty} \gamma_t^2 < \infty$ , then  $D_{\infty} \leq \exp(LA \sum_{t=1}^{\infty} \gamma_t^2) < \infty$ . Next, if we assume  $\gamma_t \leq 1/LB$ , then  $\gamma_t - LB\gamma_t^2/2 \geq \gamma_t - \gamma_t^2/2 = \gamma_t/2$ . This can be used to lower bound the LHS of the inequality above:

$$\sum_{t=1}^T \prod_{i=t+1}^T (1 + LA\gamma_i^2) \left(\gamma_t - \frac{LB\gamma_t^2}{2}\right) r_{t-1} \geq \frac{1}{2} \sum_{t=1}^T \prod_{i=t+1}^T (1 + LA\gamma_i^2) \gamma_t r_{t-1} \geq \frac{1}{2} \sum_{t=1}^T \gamma_t r_{t-1}, \quad (12)$$

as  $\prod_{i=1}^T (1 + LA\gamma_i^2) \geq 1$ .  $\square$

In particular,  $\min_{1 \leq t \leq T} r_t \leq \left(2\delta_0 + \frac{C}{A} - \frac{2\delta_T}{D_T}\right) \frac{D_T}{\sum_{t=1}^T \gamma_t} \leq \left(2\delta_0 + \frac{C}{A}\right) \frac{D_T}{\sum_{t=1}^T \gamma_t}$ . Note that  $\min_{1 \leq t \leq T} r_t \rightarrow 0$  as  $\sum_{t=1}^{\infty} \gamma_t = \infty$  and  $\sum_{t=1}^{\infty} \gamma_t^2 < \infty$  (i.e.  $D_{\infty} \leq \exp(LA \sum_{t=1}^{\infty} \gamma_t^2) < \infty$  as  $1 + x \leq \exp(x)$ ).

The next corollary gives the nonconvex convergence of SGD for constant stepsize.

*Proof of Corollary 1.* First, we use that  $\gamma \sum_{t=1}^T r_{t-1} \geq \gamma T \min_{1 \leq t \leq T} r_t$ . The rest follows directly by letting  $\gamma = \sqrt{\ln(3)/LAT}$  such that  $D_T = (1 + LA\gamma^2)^T = (1 + \ln(3)/T)^T \leq e^{\ln(3)} = 3$ ; here we see  $T$  as a fixed and known quantity. Note that the inequality  $T \geq \ln(3)LB^2/A$  implies that  $\gamma \leq 1/LB$  is satisfied.  $\square$

The next corollary gives the classic nonconvex convergence of SGD for a special choice of decreasing stepsize.

**Corollary 2** (Decreasing learning rate of Theorem 1). *For decreasing learning rates on the form  $\gamma_t = \gamma t^{-\alpha}$  with  $\alpha \in (1/2, 1)$ , we have*

$$\min_{1 \leq t \leq T} r_t \leq \frac{1 - \alpha}{\gamma T^{1-\alpha}} \left( 2\delta_0 + \frac{C}{A} \right) \exp \left( \frac{2\alpha\gamma^2 LA}{2\alpha - 1} \right).$$

*Proof of Corollary 2.* Similarly to before, we first use that  $\sum_{t=1}^T \gamma_t r_{t-1} \geq \min_{1 \leq t \leq T} r_t \sum_{t=1}^T \gamma_t$ . The rest follows with the help of integral tests for convergence;  $\sum_{t=1}^T t^{-\alpha} \geq \int_1^T x^{-\alpha} dx \geq T^{1-\alpha}/(1-\alpha)$  and  $\sum_{t=1}^T t^{-2\alpha} = 1 + \sum_{t=2}^T t^{-2\alpha} \leq 1 + \int_1^T x^{-2\alpha} dx \leq 1 + 1/(2\alpha - 1) = 2\alpha/(2\alpha - 1)$ , as  $\alpha \in (1/2, 1)$ .  $\square$

## B.2 CONVERGENCE OF SGD USING EXPECTED SMOOTHNESS—BETTER RESULT FOR CONSTANT AND DECREASING STEPSIZE

We begin by giving the proof of Theorem 2.

*Proof of Theorem 2.* For any  $k \in [T]$ , we can lower bound the second term,  $\frac{1}{2} \sum_{t=1}^T \prod_{i=t+1}^T (1 + LA\gamma_i^2) \gamma_t r_{t-1}$  of (12) in Theorem 1, as follows:

$$\begin{aligned} \frac{1}{2} \sum_{t=1}^T \prod_{i=t+1}^T (1 + LA\gamma_i^2) \gamma_t r_{t-1} &= \frac{1}{2} \sum_{t=1}^{k-1} \prod_{i=t+1}^T (1 + LA\gamma_i^2) \gamma_t r_{t-1} \\ &\quad + \frac{1}{2} \sum_{t=k}^T \prod_{i=t+1}^T (1 + LA\gamma_i^2) \gamma_t r_{t-1} \\ &\geq \frac{1}{2} \min_{1 \leq t \leq k-1} r_t \sum_{t=1}^{k-1} \prod_{i=t+1}^T (1 + LA\gamma_i^2) \gamma_t \\ &\quad + \frac{1}{2} \min_{k \leq t \leq T} r_t \sum_{t=k}^T \prod_{i=t+1}^T (1 + LA\gamma_i^2) \gamma_t \\ &\geq \frac{1}{2LA\gamma_1} \min_{1 \leq t \leq k-1} r_t \prod_{t=1}^T (1 + LA\gamma_t^2) \\ &\quad + \frac{1}{2LA\gamma_k} \min_{k \leq t \leq T} r_t \prod_{t=k}^T (1 + LA\gamma_t^2) \\ &= \frac{D_T}{2LA\gamma_1} \min_{1 \leq t \leq k-1} r_t + \frac{D_T}{2LA\gamma_k D_k} \min_{k \leq t \leq T} r_t \\ &\geq \frac{D_T}{2LA\gamma_k D_k} \min_{k \leq t \leq T} r_t. \end{aligned}$$

Note that,  $\sum_{t=1}^T \prod_{i=t+1}^T (1 + LA\gamma_i^2) \left( \gamma_t - \frac{LB\gamma_k^2}{2} \right) r_{t-1}$  in (12) of Theorem 1 is bounded above by

$$\left( \delta_0 + \frac{C}{2A} \right) D_T.$$

Combining these together we obtain the result.  $\square$

**Convergence of SGD for fixed stepsize—Proof of Theorem 3.** To help the reader, we sketched the key steps in the main paper. The technique used in our calculation is to estimate the quantities,  $W, \frac{FW}{E}, \frac{D^{t+1}}{E}$ , first, and then working on the upper and lower bounds of the quantities on the right and left side, respectively, of the inequality (6). The last estimates also require conditions on choosing the appropriate stepsize parameter. Below find our detailed derivations.

In the nonconvex convergence of SGD, by using the  $L$ -smoothness of  $F$  and *expected smoothness* of the stochastic gradients, we arrive at the following key inequality; see Lemma 2 by Khaled & Richtárik (2022):

$$\gamma_t(1 - \frac{LB\gamma_t}{2})\mathbb{E}\|\nabla F_t\|^2 \leq (1 + L\gamma_t^2 A)(\mathbb{E}(F_t) - F_*) - (\mathbb{E}(F_{t+1}) - F_*) + \frac{L\gamma_t^2 C}{2}. \quad (13)$$

Denote  $r_t = \mathbb{E}\|\nabla F_t\|^2$ ,  $\delta_t = \mathbb{E}(F_t) - F_*$ ,  $D := (1 + L\gamma^2 A)$ ,  $E := \gamma(1 - \frac{LB\gamma}{2})$ ,  $F := \frac{L\gamma^2 C}{2}$ , and rewrite (13) as

$$\delta_{t+1} \leq D\delta_t - Er_t + F, \quad (14)$$

which after unrolling the recurrence becomes

$$\delta_{T+1} \leq D^{T+1}\delta_0 - E \sum_{t=0}^T D^{T-t} r_t + F \sum_{t=0}^T D^t. \quad (15)$$

Denote  $W = \sum_{t=0}^T D^t$ . Rearranging the terms again and dividing both sides by  $E$  we have

$$\sum_{t=0}^T D^{T-t} r_t + \frac{\delta_{T+1}}{E} \leq \frac{D^{T+1}}{E} \delta_0 + \frac{FW}{E}. \quad (16)$$

Note that

$$W = \sum_{t=0}^T D^t = \frac{(1 + L\gamma^2 A)^{T+1} - 1}{L\gamma^2 A}, \quad \frac{FW}{E} = \frac{C[(1 + L\gamma^2 A)^{T+1} - 1]}{\gamma A(2 - LB\gamma)},$$

and

$$\frac{D^{T+1}}{E} = \frac{2(1 + L\gamma^2 A)^{T+1}}{\gamma(2 - LB\gamma)}.$$

Therefore, (16) can be written as

$$\sum_{t=0}^T (1 + L\gamma^2 A)^{T-t} r_t + \frac{2\delta_{T+1}}{\gamma(2 - LB\gamma)} \leq \frac{2(1 + L\gamma^2 A)^{T+1}}{\gamma(2 - LB\gamma)} \delta_0 + \frac{C[(1 + L\gamma^2 A)^{T+1} - 1]}{\gamma A(2 - LB\gamma)}. \quad (17)$$

Let  $\eta \in (0, 1]$ . Then the left-hand side in the inequality (17) is bounded from below by

$$\min_{(1-\eta)T \leq t \leq T} r_t \sum_{(1-\eta)T \leq t \leq T} (1 + L\gamma^2 A)^{T-t} \geq (\eta T - 1) \min_{(1-\eta)T \leq t \leq T} r_t;$$

if  $LB\gamma \leq 1$  and  $(1 + L\gamma^2 A)^{T+1} \leq 3$  then the right-hand side of (17) could be bounded from above by

$$\frac{6\delta_0}{\gamma} + \frac{2C}{\gamma A}. \quad (18)$$

Hence, we obtain

$$\min_{(1-\eta)T \leq t \leq T} r_t \leq 2 \left( 3\delta_0 + \frac{C}{A} \right) \frac{1}{(\eta T - 1)\gamma}. \quad (19)$$

Now, letting  $\gamma := \sqrt{\frac{\ln 3}{(T+1)LA}}$ , we are able to show the following result:

Let  $T$  satisfy the inequality in the Theorem. We first estimate  $(\eta T - 1)\gamma$  from below. We have

$$(\eta T - 1)\gamma = \frac{\eta T - 1}{\sqrt{T+1}} \frac{\sqrt{\ln 3}}{\sqrt{LA}} > \frac{\frac{1}{2}\eta T}{\sqrt{2T}} \frac{\sqrt{\ln 3}}{\sqrt{LA}} = \frac{\eta\sqrt{\ln 3}}{2\sqrt{2LA}} \sqrt{T}$$



since  $T \geq 2/\eta$  and  $T \geq 1$ . Using this estimate in inequality (6), we get

$$\min_{(1-\eta)T \leq t \leq T} r_t \leq 2 \left( 3\delta_0 + \frac{C}{A} \right) \frac{2\sqrt{2LA}}{\eta\sqrt{\ln 3}\sqrt{T}}$$

which is less than  $\varepsilon$  by the choice of  $T$ . Next, using the well-known inequality  $1 + x \leq e^x$  for all  $x \geq 0$ , we have

$$(1 + L\gamma^2 A)^{T+1} = \left( 1 + \frac{\ln 3}{T+1} \right)^{T+1} \leq e^{\ln 3} = 3.$$

Finally, note that the inequality  $T + 1 \geq LB^2 \ln 3/A$  implies that  $LB\gamma \leq 1$  is satisfied. So, we verified that if  $T$  is chosen as in the Theorem, all the needed inequalities for obtaining inequality (6) are true. This completes our proof of Theorem 3.

**Convergence of SGD for decreasing stepsize—Proof of Theorem 4.** We provide more details for the proof sketched in Section 3. Recall that  $w_{-1} = 1$  and  $w_t = \frac{w_{t-1}}{(1+L\gamma_t^2 A)}$  and recall (7)

$$\sum_{t=0}^T w_t \gamma_t \left( 1 - \frac{LB\gamma_t}{2} \right) r_t \leq \delta_0 + \frac{LC}{2} \sum_{t=0}^T w_t \gamma_t^2. \quad (20)$$

Since  $\{w_t\}_{t=0}^T$  is a non-negative, decreasing weighting sequence, we have  $w_T \leq w_t \leq w_{-1} = 1$  for all  $t \in [T]$ . Now consider,  $\gamma_t = \frac{\gamma_0}{\sqrt{t+1}}$  with  $\gamma_0 > 0$  a decreasing stepsize sequence for all  $t \in [T]$ . As a consequence, we have

$$\sum_{t=0}^T w_t \gamma_t^2 \leq \gamma_0^2 \int_{t=0}^T \frac{1}{t+1} dt = \gamma_0^2 (\ln(T+1) + 1).$$

Hence, the right hand side of (20) is bounded above by

$$\delta_0 + \frac{LC}{2} \sum_{t=0}^T w_t \gamma_t^2 \leq \left( \delta_0 + \frac{LC}{2} \gamma_0^2 \ln(T+1) \right). \quad (21)$$

Following the same technique as in the constant stepsize case, the left hand side of (20) is bounded from below by

$$\sum_{t=0}^T w_t \gamma_t \left( 1 - \frac{LB\gamma_t}{2} \right) r_t \geq w_T \min_{(1-\eta)T \leq t \leq T} r_t \left( \sum_{t=(1-\eta)T}^T \gamma_t \left( 1 - \frac{LB\gamma_t}{2} \right) \right). \quad (22)$$

We will pause here and estimate the quantities. It is straight-forward to find out

$$\sum_{t=(1-\eta)T}^T \gamma_t \geq \gamma_0 \int_{t=(1-\eta)T}^T \frac{1}{\sqrt{t+1}} dt = \gamma_0 (1 - \sqrt{1-\eta}) \sqrt{T+1}.$$

and

$$\sum_{t=(1-\eta)T}^T \frac{LB}{2} \gamma_t^2 \leq \frac{LB}{2} \gamma_0^2 \int_{t=[(1-\eta)T]}^T \frac{1}{t+1} dt + 1 = \frac{LB\gamma_0^2}{2} (\ln(T+1) - \ln([(1-\eta)T] + 1)).$$

Recall that, by definition

$$w_T = \frac{w_{-1}}{\prod_{t=0}^T (1 + LA\gamma_t^2)} \geq \frac{w_{-1}}{\left( \frac{\sum_{t=0}^T (1 + LA\gamma_t^2)}{T+1} \right)^{T+1}}.$$

The last inequality is due to the arithmetic-geometric inequality.

Next, we upper bound

$$\left( \frac{\sum_{t=0}^T (1 + LA\gamma_t^2)}{T+1} \right)^{T+1} \stackrel{\gamma_t = \frac{\gamma_0}{\sqrt{t+1}}}{=} \left( 1 + \frac{LA \sum_{t=0}^T \frac{\gamma_0^2}{t+1}}{T+1} \right)^{T+1} \leq \left( 1 + \frac{LA\gamma_0^2 \ln(T+1)}{T+1} \right)^{T+1}.$$

Considering  $LA\gamma_0^2 \ln(T+1) < 1$  we have

$$\left(1 + \frac{LA\gamma_0^2 \ln(T+1)}{T+1}\right)^{T+1} \leq \frac{1}{1 - LA\gamma_0^2 \ln(T+1)}.$$

Taken together, we can find (22) is further lower bounded by

$$(1 - LA\gamma_0^2 \ln(T+1)) \min_{(1-\eta)T \leq t \leq T} r_t (\gamma_0(1 - \sqrt{1-\eta})\sqrt{T+1} - \frac{LB\gamma_0^2}{2} \ln(T+1) + \frac{LB\gamma_0^2}{2} \ln([(1-\eta)T] + 1)). \quad (23)$$

Combining (21) and (23) completes the proof of Theorem 4 for stepsize  $\gamma_t = \frac{\gamma_0}{\sqrt{t+1}}$ .

Additionally, we show the nonconvex convergence of SGD for decreasing learning rates of the form  $\gamma_t = \gamma t^{-\alpha}$  with  $\alpha \in (1/2, 1)$  in the following Corollary.

**Corollary 3** (Decreasing learning rate of Theorem 2). *For decreasing learning rates on the form  $\gamma_t = \gamma t^{-\alpha}$  with  $\alpha \in (1/2, 1)$ , we have after*

$$k \geq \left(\frac{1-\alpha}{\gamma\epsilon} \left(2\delta_0 + \frac{C}{A}\right) \exp\left(\frac{2\alpha\gamma^2 LA}{2\alpha-1}\right)\right)^{\frac{1}{1-\alpha}}$$

iterations that

$$\min_{k \leq t \leq T} r_t \leq \epsilon, \quad \epsilon > 0.$$

*Proof of Corollary 3.* This results follows directly from Theorem 2 with use of Corollary 2, e.g. see the proof technique in Needell et al. (2014).  $\square$

### B.3 CONVERGENCE OF RANDOM RESHUFFLING-SGD (RR-SGD)

The existing programming interfaces in ML toolkits such as PyTorch (Pytorch.org, 2019) and TensorFlow (tensorflow.org, 2015) use a different approach—*random reshuffling* or *randomness without replacement* (Mishchenko et al., 2020; Gürbüzbalaban et al., 2021). In this case, at each cycle,  $t$ , a random permutation,  $\sigma_t$ , of the set  $[n]$  is selected, and one complete run is performed taking all indices from  $\sigma_t$ , which guarantees that each function in (1) contributes exactly once. Formally, RR-SGD updates are of the form:

$$x_{(t-1)n+i} = x_{(t-1)n+i-1} - \gamma_t g_{\sigma_t(i)}(x_{(t-1)n+i-1}), \quad i = 1, 2, \dots, n; \quad t = 1, 2, 3, \dots,$$

where  $g_{\sigma_t(i)}(x_j)$  is the stochastic gradient calculated at  $x_j$ . RR-SGD posses faster convergence than regular SGD (Mishchenko et al., 2020; Gürbüzbalaban et al., 2021), leaves less stress on the memory (cf. Section 19.2.1 in Bengio (2012)), and hence more practical.

We state the bounded variance assumption of gradients from Mishchenko et al. (2020) that is used in proving the nonconvex descent lemma of RR-SGD; see Lemma 1. For details of how Assumptions 3 and 4 are connected see Mishchenko et al. (2020).

**Assumption 4. (Bounded variance of gradients)** *There exist constants,  $\mathcal{A}, \mathcal{B} \geq 0$ , such that, for all  $x \in \mathbb{R}^d$ , the variance of gradients follow*

$$\frac{1}{n} \sum_{i \in [n]} \|\nabla f_i(x) - \nabla F(x)\|^2 \leq 2\mathcal{A}(F(x) - F_*) + \mathcal{B}.$$

Recently, Mishchenko et al. (2020) showed a better nonconvex convergence of RR-SGD compared to prior work of Nguyen et al. (2021) without the bounded gradient assumption. Mishchenko et al. (2020) followed Assumption 4—bounded variance of gradients. In this section, we sketch the key steps of the convergence of RR-SGD. We start by quoting the key descent Lemma used for the convergence of RR-SGD from Mishchenko et al. (2020). We focus on constant stepsize case, results for decreasing stepsize follow the similar arguments.

**Lemma 1.** *Let  $F$  follow Assumptions 1, 2, and 4, and the update rule in (24) is run for  $T$  epochs. Then for  $\gamma \leq \frac{1}{2Ln}$  and  $t \in \{0, 1, \dots, T-1\}$ , the iterates of (24) satisfy*

$$(\mathbb{E}(F_{t+1}) - F_*) \leq (1 + \mathcal{A}L^2n^2\gamma^3) (\mathbb{E}(F_t) - F_*) - \frac{\gamma^n}{2} (1 - \gamma^2L^2n^2) \mathbb{E}\|\nabla F_t\|^2 + \frac{L^2\gamma^3n^2\mathcal{B}}{2}, \quad (24)$$

where  $T$  denotes the total number of epochs.

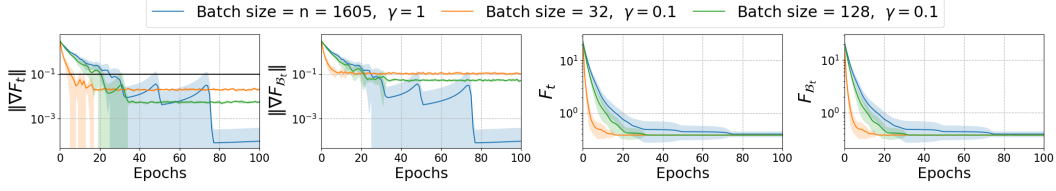

Figure 4: Average of 10 runs of RR-SGD on logistic regression with nonconvex regularization. Batch size,  $n = 1605$ , represents full batch. In the first column, the horizontal lines correspond to the precision,  $\epsilon = 10^{-1}$ , and conform to our theoretical result in Theorem 7—If the total number of iterations is large enough then almost all the iterates in the tail are  $\epsilon$ -stationary points.

Proceeding similarly as before, and letting  $\gamma_t = \gamma := \left(\frac{\ln 3}{(T+1)\mathcal{A}L^2n^2}\right)^{\frac{1}{3}}$ , we can show the following result.

**Theorem 7.** *Let  $F$  follow Assumptions 1, 2, and 4, and the update rule in (24) is run for  $T$  epochs. Let  $\epsilon > 0$  and  $\eta \in (0, 1]$ . If the number of epochs  $T > 1$  satisfies*

$$T \geq \max \left\{ 27 \left( 3\delta_0 + \frac{\mathcal{B}}{\mathcal{A}} \right)^3 \frac{\mathcal{A}L^2}{n\eta^2\epsilon^2}, \frac{8Ln \ln 3}{\mathcal{A}} - 1, \frac{2}{\eta} \right\},$$

then, there exists an index,  $t \geq (1 - \eta)T$ , such that  $\mathbb{E}\|\nabla F_t\|^2 \leq \epsilon$ .

Denote  $r_t = \mathbb{E}\|\nabla F_t\|^2$ ,  $\delta_t = \mathbb{E}(F_t) - F_*$ ,  $D_2 := (1 + \mathcal{A}L^2n^2\gamma^3)$ ,  $E_2 = \frac{\gamma n}{2}(1 - \gamma^2L^2n^2)$ ,  $F_2 := \frac{L^2\gamma^3n^2\mathcal{B}}{2}$ . Rewrite (24) as

$$\delta_{t+1} \leq D_2\delta_t - E_2r_t + F_2,$$

which after unrolling the recurrence becomes

$$\delta_{t+1} \leq D_2^{t+1}\delta_0 - E_2 \sum_{j=0}^t D_2^{t-j}r_j + F_2 \sum_{j=0}^t D_2^j. \quad (25)$$

Denote  $W_2 = \sum_{j=0}^t D_2^j$ . Rearranging the terms again and dividing both sides by  $E_2$  we have

$$\sum_{j=0}^t D_2^{t-j}r_j + \frac{\delta_{t+1}}{E_2} \leq \frac{D_2^{t+1}}{E_2}\delta_0 + \frac{F_2W_2}{E_2}. \quad (26)$$

Note that

$$W_2 = \sum_{j=0}^t D_2^j = \frac{D_2^{t+1} - 1}{D_2 - 1} = \frac{(1 + \mathcal{A}L^2n^2\gamma^3)^{t+1} - 1}{\mathcal{A}L^2n^2\gamma^3},$$

$$\frac{F_2W_2}{E_2} = \frac{L^2\gamma^3n^2\mathcal{B}}{2} \frac{(1 + \mathcal{A}L^2n^2\gamma^3)^{t+1} - 1}{\mathcal{A}L^2n^2\gamma^3} \frac{2}{\gamma n(1 - \gamma^2L^2n^2)} = \frac{\mathcal{B}[(1 + \mathcal{A}L^2n^2\gamma^3)^{t+1} - 1]}{\mathcal{A}\gamma n(1 - \gamma^2L^2n^2)},$$

and

$$\frac{D_2^{t+1}}{E_2} = \frac{2(1 + \mathcal{A}L^2n^2\gamma^3)^{t+1}}{\gamma n(1 - \gamma^2L^2n^2)}.$$

Therefore, (26) can be written as

$$\sum_{j=0}^t (1 + \mathcal{A}L^2n^2\gamma^3)^{t-j}r_j + \frac{2\delta_{t+1}}{\gamma n(1 - \gamma^2L^2n^2)} \leq \frac{2(1 + \mathcal{A}L^2n^2\gamma^3)^{t+1}}{\gamma n(1 - \gamma^2L^2n^2)}\delta_0 + \frac{\mathcal{B}[(1 + \mathcal{A}L^2n^2\gamma^3)^{t+1} - 1]}{\mathcal{A}\gamma n(1 - \gamma^2L^2n^2)}. \quad (27)$$

Let  $\eta \in (1/t, 1)$  (assuming  $t > 1$ ). Setting  $\gamma \leq \frac{1}{\sqrt{3Ln}}$ , we have  $\frac{2\delta_{t+1}}{\gamma n(1 - \gamma^2L^2n^2)} > 0$ . Therefore, the left-hand side in the inequality (27) is bounded from below by

$$\min_{(1-\eta)t \leq j \leq t} r_j \sum_{(1-\eta)t \leq j \leq t} (1 + \mathcal{A}L^2n^2\gamma^3)^{t-j} \geq (\eta t - 1) \min_{(1-\eta)t \leq j \leq t} r_j;$$

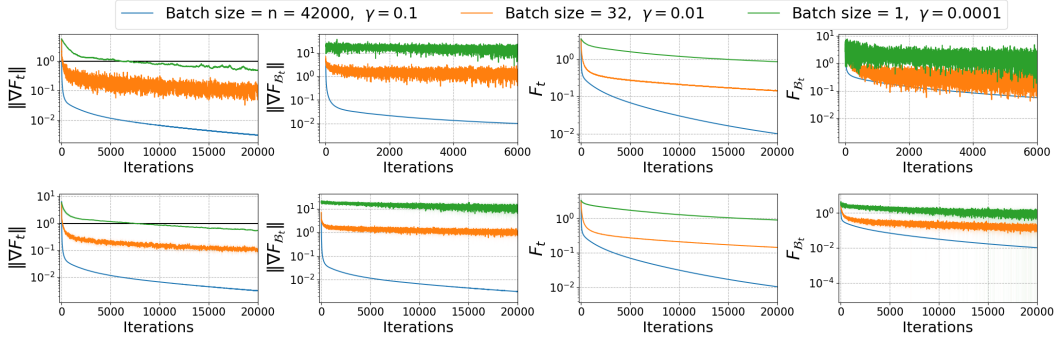

Figure 5: Performance of RR-SGD on MNIST digit classification. The top row shows the result of 1 single run of RR-SGD while the bottom row shows the result of the average of 10 runs. For the plots in the first column, the horizontal lines correspond to the precision,  $\epsilon = 1$ —For RR-SGD, if the total number of iterations is large enough then the entire tail comprises of the  $\epsilon$ -stationary points.

while if  $\gamma \leq \frac{1}{\sqrt{3Ln}}$  and  $(1 + \mathcal{A}L^2n^2\gamma^3)^{t+1} \leq 3$  then the right-hand side of (27) could be bounded from above by

$$\frac{9\delta_0}{\gamma n} + \frac{3\mathcal{B}}{\mathcal{A}\gamma n}.$$

Hence, we obtain

$$\min_{(1-\eta)^t \leq j \leq t} r_j \leq 3 \left( 3\delta_0 + \frac{\mathcal{B}}{\mathcal{A}} \right) \frac{1}{(\eta t - 1)\gamma n}. \quad (28)$$

Considering the step size

$$\gamma = \gamma_t := \left( \frac{\ln 3}{(t+1)\mathcal{A}L^2n^2} \right)^{\frac{1}{3}},$$

we complete the proof of Theorem 7.

#### B.4 CONVERGENCE OF SGD FOR NONCONVEX AND NONSMOOTH OBJECTIVE

Consider a nonconvex, nonsmooth, finite-sum optimization problem by writing (1) of the form:

$$\min_{x \in \mathbb{R}^d} \left[ F(x) := \frac{1}{n} \sum_{i=1}^n f_i(x) + h(x) \right], \quad (29)$$

$:= f(x)$

where each  $f_i(x) : \mathbb{R}^d \rightarrow \mathbb{R}$  is smooth (possibly nonconvex) for all  $i \in [n]$ , and  $h : \mathbb{R}^d \rightarrow \mathbb{R}$  is nonsmooth but (non)-convex and relatively simple. Consider a mapping,  $\mathcal{G}_\eta : \mathbb{R}^d \rightarrow \mathbb{R}^d$  such that

$$\mathcal{G}_\eta(x) := \frac{1}{\eta}(x - \text{prox}_{\eta h}(x - \nabla f(x))), \quad (30)$$

where for a nonsmooth, proper, closed function,  $h$ , the proximal operator is defined as

$$\text{prox}_{\eta h}(x) := \arg \min_{y \in \mathbb{R}^d} \left( h(y) + \frac{1}{2\eta} \|y - x\|^2 \right). \quad (31)$$

**Theorem 8.** *Under the same assumptions as in Reddi et al. (2016), there exists an index,  $t \geq (1 - \eta)T$  such that,  $\mathbb{E}\|\mathcal{G}_\eta(x_t)\|^2 \leq O\left(\frac{1}{\eta T}\right)$ , where  $\eta \in (0, 1]$ .*

The proof of convergence follows similar argument as in Reddi et al. (2016) combined with our techniques. Moreover, our result can be extended to proximal stochastic gradient algorithms (with or without variance reduction) for nonconvex, nonsmooth finite-sum problems (Reddi et al., 2016; Li & Li, 2018), and for non-convex problems with a non-smooth and non-convex regularizer (Xu et al., 2019).

## C REPRODUCIBLE RESEARCH

Our code and results are publicly available at <https://anonymous.4open.science/r/nonconvex-convergence-SGD-2844/README.md>.
